# Supplementary material for: Auranofin is a potent suppressor of osteosarcoma metastasis
Source: PubMed Central journal article supplement (PMC4808036; doi:10.18632/oncotarget.5704), 2015-11-09
Supplement: oncotarget-07-0831-s001.pdf [file oncotarget-07-0831-s001.pdf]

## SUPPLEMENTARY FIGURES AND TABLE

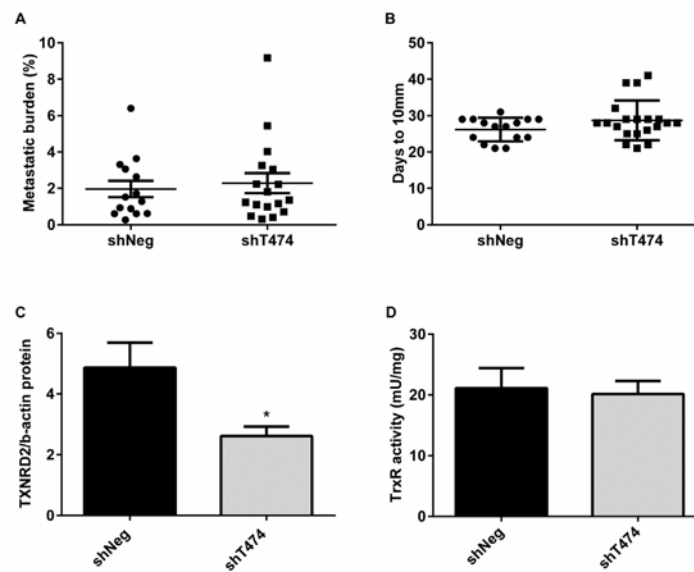

**Supplementary Figure S1: TXNRD1 compensates for activity in TXNRD2 knockdown.** **A.** Metastatic burden and **B.** primary tumour growth of TrxR2-silenced cells (shT474) is unchanged in an orthotopic mouse model of OS. **C.** Immunoblot quantification of TrxR2 protein knockdown in the tumours in (A) and (B), corrected for B-actin expression. \* $P < 0.05$ . **D.** Total thioredoxin activity in the TrxR2 knockdown cells is unchanged.

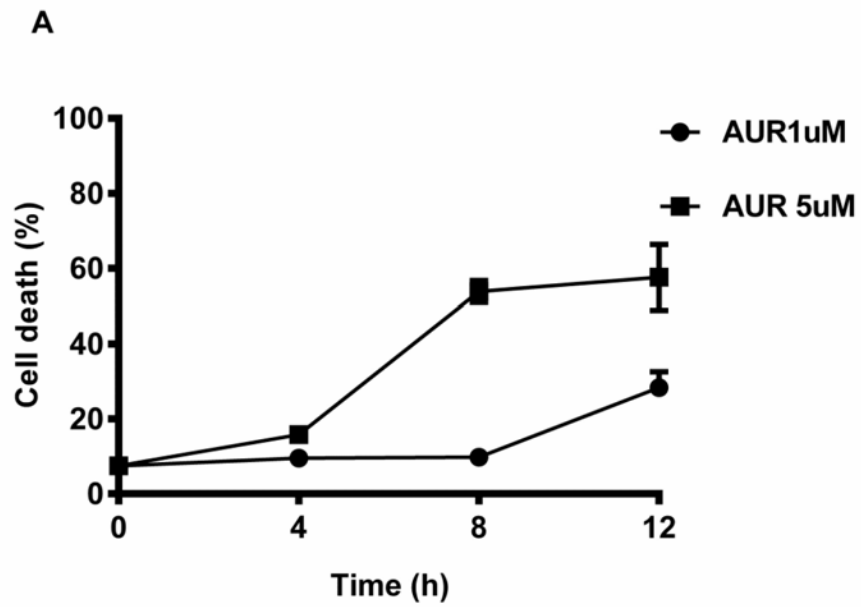

**Supplementary Figure S2: Time course of auranofin-induced apoptosis in OS cells.** KHOS cells were treated with 1 and 5  $\mu$ M AF over 12 hours to determine the highest level of cell death as measured by Annexin-V and PI staining.

**Supplementary Table S1: Top 19 genes overexpressed in a comparative transcriptomic analysis of highly and poorly metastatic clonal variants of OS**

| Gene                                                        | Symbol   | B statistic | FC   |
|-------------------------------------------------------------|----------|-------------|------|
| Stanniocalcin 2                                             | STC2     | 12.53       | 6.81 |
| Cadherin 2, type 1, N-cadherin (neuronal)                   | CDH2     | 15.63       | 6.45 |
| Paired related homeobox 1                                   | PRRX1    | 8.13        | 5.07 |
| Vascular endothelial growth factor A                        | VEGFA    | 13.26       | 4.17 |
| S100 calcium binding protein A4                             | S100A4   | 8.93        | 4.12 |
| Growth differentiation factor 15                            | GDF15    | 8.18        | 3.77 |
| Oral cancer overexpressed 1                                 | ORAOV1   | 8.06        | 2.99 |
| Integrin, beta 2                                            | ITGB2    | 9.29        | 2.97 |
| Protease, serine, 3                                         | PRSS3    | 6.16        | 2.90 |
| Potassium voltage-gated channel, subfamily F, member 1      | KCNF1    | 6.86        | 2.84 |
| Ankyrin repeat and SOCS box containing 1                    | ASB1     | 10.37       | 2.73 |
| Leupaxin                                                    | LPXN     | 6.96        | 2.65 |
| ATPase, class II, type 9A                                   | ATP9A    | 9.03        | 2.59 |
| Placenta-specific 8                                         | PLAC8    | 5.43        | 2.55 |
| Transporter 1, ATP-binding cassette, sub-family B (MDR/TAP) | TAP1     | 8.24        | 2.53 |
| Laminin, beta 3                                             | LAMB3    | 5.38        | 2.52 |
| Transmembrane protein 200A                                  | TMEM200A | 7.87        | 2.34 |
| Chloride intracellular channel 6                            | CLIC6    | 7.62        | 2.28 |
| Thioredoxin reductase 2                                     | TXNRD2   | 4.71        | 2.19 |

Illumina gene names and symbols are listed. A B-statistic  $> 3$  indicates a 95% chance that the gene is truly differentially expressed. FC = fold change.
